# Supplementary material for: Asymptomatic Orthopoxvirus Circulation in Humans in the Wake of a Monkeypox Outbreak among Chimpanzees in Cameroon
Source: PubMed Central journal article supplement (PMC6947779; doi:10.4269/ajtmh.19-0467), 2019-11-25
Supplement: tpmd190467.SD1.pdf [file tpmd190467.SD1.pdf]

**Supplemental Table S1. Univariable models predicting contact with Gambian rats.**

| <u>Outcome</u>    | <u>Variable (ref)<sup>§</sup></u> | <u>OR</u>    | <u>(95% CI)</u> | <u>SE</u>         | <u>P</u>          | <u>QICu/ AIC</u> |
|-------------------|-----------------------------------|--------------|-----------------|-------------------|-------------------|------------------|
| Any contact       | Age*                              | 0.50         | (0.50- 0.51)    | 0.010             | 0.056             | 166.83†          |
|                   | Location(Park)*                   |              |                 |                   |                   | 140.62           |
|                   | Metet                             | 2.80         | (1.01- 7.77)    | 0.62              | <b>0.0017</b>     |                  |
|                   | Ndangueng I                       | 1.038E11     | (0- Infy)       | 97120.96          | 0.99              |                  |
|                   | Ndzefidi                          | 2.63         | (1.16- 5.93)    | 0.53              | <b>0.0004</b>     |                  |
|                   | Nkilzok I                         | 1.43         | (12.63- 1.43)   | 0.65              | <b>0.0003</b>     |                  |
|                   | Education(None)*                  |              |                 |                   |                   | 164.75†          |
|                   | Some primary                      | 0.46         | (0.07- 3.11)    | 0.35              | 0.42              |                  |
|                   | Some secondary                    | 0.30         | (0.06- 1.54)    | 0.55              | 0.15              |                  |
|                   | Superior                          | 0.06         | (0.01- 0.34)    | 0.59              | <b>0.0014</b>     |                  |
|                   | Forest visits(<Once)              |              |                 |                   |                   | 166.10†          |
|                   | >Once per week                    | 1.89         | (0.77- 4.65)    | 0.46              | <0.0001           |                  |
|                   | Pop.(Community)*‡                 |              |                 |                   |                   |                  |
|                   | Park                              | 0.41         | (0.41- 0.41)    | 0.24              | <b>&lt;0.0001</b> | 140.86           |
| Hunted            | Sex (Female)                      |              |                 |                   |                   | 149.74           |
|                   | Male                              | 2.15         | (0.8- 5.8)      | 0.51              | 0.13              | 94.03            |
|                   | Location(Park)*                   |              |                 |                   |                   |                  |
|                   | Metet                             | 3.79         | (1.07- 13.5)    | 0.65              | <b>0.039</b>      |                  |
|                   | Ndangueng I                       | 29.25        | (5.05- 169.47)  | 0.90              | <b>0.0002</b>     |                  |
|                   | Ndzefidi                          | 8.0          | (2.59- 24.74)   | 0.58              | <b>0.0003</b>     |                  |
|                   | Nkilzok I                         | 5.90         | (1.76- 19.88)   | 0.62              | <b>0.0041</b>     |                  |
|                   | Education(None)*                  |              |                 |                   |                   | 165.38†          |
|                   | Some primary                      | 4.20         | (0.87- 20.29)   | 0.80              | 0.07              |                  |
|                   | Some secondary                    | 3.57         | (0.62- 20.70)   | 0.90              | 0.16              |                  |
|                   | Superior                          | 0.42         | (0.02- 7.55)    | 1.48              | 0.55              |                  |
|                   | Num. in HH*                       | 0.51         | (0.50- 0.51)    | 0.01              | 0.05              |                  |
|                   | Forest visits(<Once)              |              |                 |                   |                   | 168.10†          |
|                   | >once per week                    | 2.26         | (0.58- 8.71)    | 0.69              | 0.24              |                  |
| Pop.(Community)*‡ |                                   |              |                 |                   | 150.04            |                  |
| Park              | 0.14                              | (0.09- 0.22) | 0.23            | <b>&lt;0.0001</b> |                   |                  |
| Sold/ Touched     | Location(Park)                    |              |                 |                   |                   | 148.38           |
|                   | Metet                             | 2.17         | (0.82- 5.70)    | 0.60              | 0.0028            |                  |
|                   | Ndangueng I                       | 1.038E11     | (0- Infy)       | 97120.96          | 0.99              |                  |
|                   | Ndzefidi                          | 1.90         | (0.88- 4.09)    | 0.52              | 0.0014            |                  |
|                   | Nkilzok I                         | 2.50         | (0.97- 6.44)    | 0.59              | 0.0011            |                  |
|                   | Pop.(Community)*‡                 |              |                 |                   |                   | 150.30†          |
|                   | Park                              | 0.36         | (0.36- 0.36)    | 0.23              | <b>&lt;0.0001</b> |                  |
|                   | Education*                        |              |                 |                   |                   | 168.84†          |
|                   | Some primary                      | 1.71         | (0.95- 3.07)    | 0.30              | 0.075             |                  |
|                   | Some secondary                    | 1.50         | (0.71- 3.19)    | 0.38              | 0.29              |                  |
|                   | Superior                          | 0.18         | (0.05- 0.71)    | 0.70              | <b>0.014</b>      |                  |
|                   | Forest Visits*                    |              |                 |                   |                   | 170.22†          |
|                   | >once per week                    | 3.07         | (1.47- 6.41)    | 0.38              | <b>0.0028</b>     |                  |

| <u>Outcome</u> | <u>Variable (ref)<sup>§</sup></u> | <u>OR</u> | <u>(95% CI)</u> | <u>SE</u> | <u>P</u>          | <u>QICu/ AIC</u> |
|----------------|-----------------------------------|-----------|-----------------|-----------|-------------------|------------------|
| Prepared       |                                   |           |                 |           |                   | 143.73           |
|                | Location(Park)*                   |           |                 |           |                   |                  |
|                | Metet                             | 1.71      | (0.67- 4.35)    | 0.60      | 0.0026            |                  |
|                | Ndangueng I                       | 1.038E11  | (0- Infy)       | 97120.96  | 0.99              |                  |
|                | Ndzefidi                          | 2.22      | (1.01- 4.88)    | 0.54      | <b>0.0001</b>     |                  |
|                | Nkilzok I                         | 2.50      | (0.97- 6.44)    | 0.60      | 0.0003            |                  |
|                | Education*                        |           |                 |           |                   | 164.92†          |
|                | Some primary                      | 1.88      | (1.07- 3.28)    | 0.31      | <b>0.0417</b>     |                  |
|                | Some secondary                    | 1.31      | (0.38- 4.47)    | 0.42      | 0.5262            |                  |
|                | Superior                          | 0.08      | (0.01- 1.01)    | 1.23      | 0.0434            |                  |
|                | Forest visits                     |           |                 |           |                   | 171.78†          |
|                | >once per week                    | 1.42      | (0.61- 3.32)    | 0.37      | 0.0048            |                  |
| Ate            |                                   |           |                 |           |                   |                  |
|                | Age                               | 0.50      | (0.50- 0.51)    | 0.01      | 0.21              | 169.14†          |
|                | Education*                        |           |                 |           |                   | 167.0†           |
|                | Some primary                      | 2.29      | (1.15- 4.55)    | 0.79      | 0.87              |                  |
|                | Some secondary                    | 0.50      | (0.51- 4.43)    | 0.78      | 0.71              |                  |
|                | Superior                          | 0.09      | (0.95- 0.09)    | 0.75      | <b>0.011</b>      |                  |
|                | Forest visits*                    |           |                 |           |                   | 167.31†          |
|                | >once per week                    | 0.75      | (0.64- 0.83)    | 0.25      | <b>&lt;0.0001</b> |                  |

Bold denotes statistical significance.

§Reference categories are reported in parentheses.

†QICu

\*Included in multivariable modeling step (P<0.10).

‡ The variable 'population' refers to whether the participant was a community member or an employee of the primate sanctuary (indicated by 'park').
